# Supplementary material
Source: ML conference proceedings conference paper supplement (https://proceedings.mlr.press/v164/zhu22a.html)
Supplement: Supplementary file 2 [file zhu22a-supp.zip]

Archive with 2 entries (2 files):
- Motion_Forecasting_with_Unlikelihood_Training_Supplementary_Materials_CoRL.pdf
- __MACOSX/._Motion_Forecasting_with_Unlikelihood_Training_Supplementary_Materials_CoRL.pdf
